# Supplementary material for: Involvement of Pyridoxine/Pyridoxamine 5′-Phosphate Oxidase (PDX3) in Ethylene-Induced Auxin Biosynthesis in the Arabidopsis Root
Source: PubMed Central journal article supplement — Mol Cells. 2018 Nov 14;41(12):1033–44. doi: 10.14348/molcells.2018.0363 (PMC6315319; doi:10.14348/molcells.2018.0363), 2018-11-14
Supplement: molce-41-12-1033-suppl.pdf [file molce-41-12-1033-suppl.pdf]

## Supplementary Information

### **Involvement of Pyridoxine/Pyridoxamine 5'-Phosphate Oxidase (PDX3) in Ethylene-Induced Auxin Biosynthesis in the Arabidopsis Root**

**Gyuree Kim<sup>1,5</sup>, Sejeong Jang<sup>1,5</sup>, Eun Kyung Yoon<sup>1,3</sup>, Shin Ae Lee<sup>1,4</sup>, Souvik Dhar<sup>1</sup>, Jinkwon Kim<sup>1</sup>, Myeong Min Lee<sup>2</sup> and Jun Lim<sup>1,\*</sup>**

<sup>1</sup>Department of Systems Biotechnology, Konkuk University, Seoul 05029, Korea, <sup>2</sup>Department of Systems Biology, Yonsei University, Seoul 03722, Korea, <sup>3</sup>Present address: Temasek Life Sciences Laboratory, 1 Research Link, National University of Singapore, Singapore 117604, Singapore, <sup>4</sup>Present address: Department of Agricultural Biology, National Institute of Agricultural Sciences, Wanju, 55365, Korea, <sup>5</sup>These authors contributed equally to this work.

\*Correspondence:

Jun Lim

Email) [jlim@konkuk.ac.kr](mailto:jlim@konkuk.ac.kr)

Tel) +82-2-457-1341

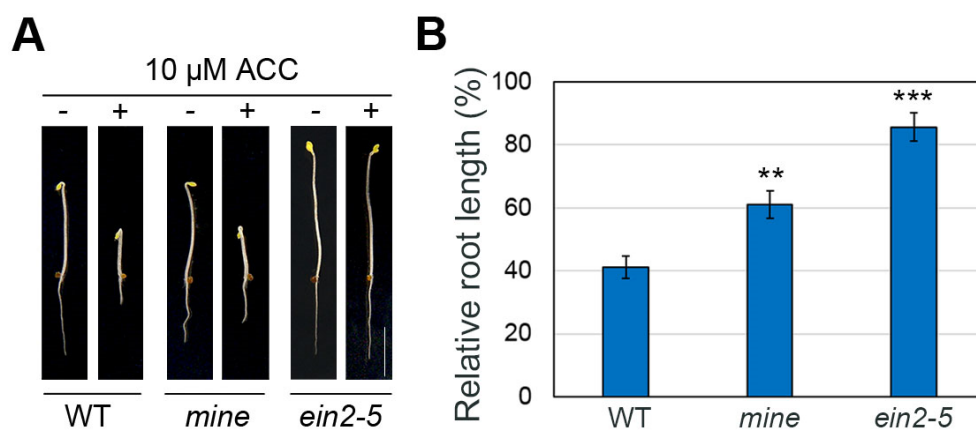

**Fig. S1. Isolation of the *mine* mutant that displays an insensitive phenotype to ACC.**

(A) Growth phenotypes of 4-d-old etiolated WT, *mine*, and *ein2-5* seedlings grown in MS plates supplemented with 10  $\mu$ M ACC. Scale bar= 0.5 cm. (B) Relative growth inhibition of WT, *mine*, and *ein2-5* roots in the presence of 10  $\mu$ M ACC. Error bars indicate  $\pm$ SD from three biological replicates. Asterisks indicate statistically significant differences compared to WT, as determined by the Student's *t*-test (\*\* $P < 0.01$ , and \*\*\* $P < 0.001$ ).

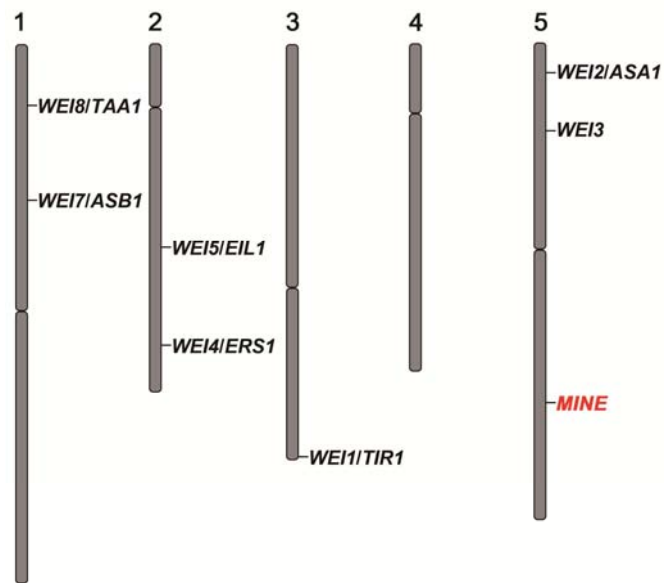

**Fig. S2. Chromosomal location of the *MINE* locus.**

The locations of *WEI* loci on Arabidopsis chromosomes 1 to 5 are shown. The *MINE* locus is indicated as red.

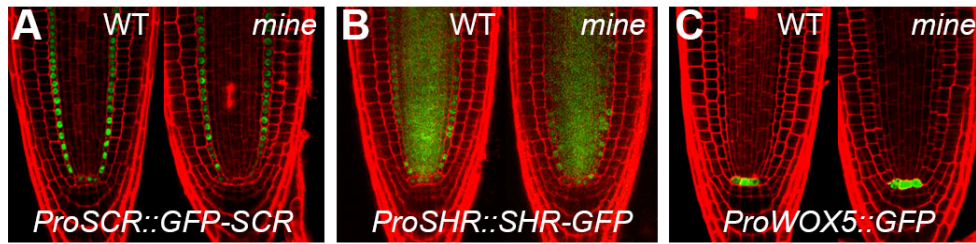

**Fig. S3.** Analysis of root growth phenotypes in WT and *mine* seedlings using root development markers.

(A) *ProSCR::GFP-SCR*. (B) *ProSHR::SHR-GFP*. (C) *ProWOX5::GFP*.

**Table S1. Sequence information of primers used in this study**

| Purpose      | Name          | Sequence (5' → 3')      |                           |
|--------------|---------------|-------------------------|---------------------------|
| TAIL-PCR     | DEG1          | WGCNAGTNAGWANAAG        |                           |
|              | DEG2          | AWGCANGNCWGANATA        |                           |
|              | pBIBLB372     | GCAGCTGGCACGACAGGTTTC   |                           |
|              | pBIBLB262     | GCTCGTATGTTGTGTGGAATTGT |                           |
|              | pBIBLB172     | GTCGACAGATCTCATGCCCTGCA |                           |
| Mapping      | KLPNHC        | FP                      | CGTTGCTCGTGGATTTTGTA      |
|              |               | RP                      | CTTGTATAAGTTCTTGCCGTGA    |
|              | PDC2          | FP                      | CAGTGGATCACTCCCAAGACGCCTC |
|              |               | RP                      | GCACTCAACTTATATATATTTTCAG |
|              | ATTED2        | FP                      | CGTAGACAAGGTACTGTCAACC    |
|              |               | RP                      | GATAATCTCGTCTCCAAGTGTC    |
| Genotyping   | <i>mine</i>   | FP                      | CAGCGAACAAGGACAAAAAACC    |
|              |               | RP                      | CATGCCGTGCCAGGTACAACAG    |
|              |               | LB                      | CGACAGATCTCATGCCCTGCAGG   |
|              | <i>ein2-5</i> | FP                      | GCTCTTGTCTTCTCTAGTC       |
|              |               | RP                      | GAAGCATCATTGCCACCAAG      |
|              | <i>wei2</i>   | LP                      | ACTTGGTGGCCAAGTTACATG     |
|              |               | RP                      | GAAGGAGACTCCACCAAAAC      |
|              | <i>wei8</i>   | LP                      | TCTTTTCCATTACAACGTGGG     |
|              |               | RP                      | CGTCAAGACCATGACATCATG     |
|              | <i>sur2</i>   | LP                      | TTTCGTGGTTCTCTCTTTTCG     |
|              |               | RP                      | GTGGTATGGGCCATGACTTA      |
|              | <i>pdx3-3</i> | LP                      | TTGAGGAGCAGGTTGAAACTG     |
|              |               | RP                      | ACCTGACGTTCAAAATTTCC      |
|              | SALK_LBb1.3   |                         | ATTTTGCCGATTTTCGGAAC      |
|              | RT-qPCR       | <i>MINE/PDX3</i>        | FP                        |
| RP           |               |                         | TACGAATTTTCCACGCAGGA      |
| <i>UBQ10</i> |               | FP                      | TGGTGGTTTGTGTTTGGGGCCTT   |
|              |               | RP                      | AGAGTCGAGTCACTTTGCAGGCCT  |
